# Supplementary material
Source: PubMed Central journal article supplement (PMC2755858)
Supplement: supp_M109.005322_Suppdata.pdf [file supp_M109.005322_Suppdata.pdf]

**Table 1**

Genes regulated in PRMT6 knockdown human osteosarcoma U2OS cells compared to siGFP control cells identified using Sentrix HumanRef-8 v3.0 Expression BeadChips (Illumina).

| Protein names                                                                                            | Protein symbols | GeneBank accession numbers | Fold Change <sup>a</sup> | P-value   |
|----------------------------------------------------------------------------------------------------------|-----------------|----------------------------|--------------------------|-----------|
| Homo sapiens actin-like 6A, transcript variant 2                                                         | ACTL6A          | NM_177989.2                | 0,44                     | 110E-08   |
| Homo sapiens adiponectin receptor 2                                                                      | ADIPOR2         | NM_024551.2                | 0,49                     | 436E-08   |
| Homo sapiens aldo-keto reductase family 1, member C3 (3-alpha hydroxysteroid dehydrogenase, type II)     | AKR1C3          | NM_003739.4                | 0,50                     | 149E-10   |
| Homo sapiens alkaline phosphatase, liver/bone/kidney                                                     | ALPL            | NM_000478.3                | 3,67                     | 201E-09   |
| Homo sapiens anthrax toxin receptor 2                                                                    | ANTXR2          | NM_058172.3                | 3,15                     | 393E-08   |
| Homo sapiens Rho GTPase activating protein 1                                                             | ARHGAP1         | NM_004308.2                | 2,24                     | 828E-09   |
| Homo sapiens Rho GDP dissociation inhibitor (GDI) beta                                                   | ARHGDI3         | NM_001175.4                | 2,16                     | 282E-08   |
| Homo sapiens ATP synthase, H <sup>+</sup> transporting, mitochondrial F0 complex, subunit C1 (subunit 9) | ATP5G1          | NM_005175.2                | 0,40                     | 447E-07   |
| Homo sapiens Chromosome 1 open reading frame 121                                                         | C1orf121        | N.A.                       | 2,45                     | 194E-08   |
| Homo sapiens Chromosome 7 open reading frame 10                                                          | C7orf10         | N.A.                       | 2,76                     | 466E-08   |
| Homo sapiens CAP, adenylate cyclase-associated protein, 2 (yeast)                                        | CAP2            | NM_006366.2                | 0,49                     | 218E-07   |
| Homo sapiens cold inducible RNA binding protein                                                          | CIRBP           | NM_001280.1                | 0,47                     | 127E-07   |
| Homo sapiens collagen, type XXII, alpha 1                                                                | COL22A1         | NM_152888.1                | 2,81                     | 231E-10   |
| Homo sapiens collagen, type V, alpha 2                                                                   | COL5A2          | NM_000393.3                | 0,47                     | 134E-09   |
| Homo sapiens collagen, type VI, alpha 3, transcript variant 3                                            | COL6A3          | NM_057165.2                | 2,42                     | 107E-10   |
| Homo sapiens collagen, type VIII, alpha 1, transcript variant 1                                          | COL8A1          | NM_001850.3                | 2,70                     | 229E-08   |
| Homo sapiens carboxypeptidase A4                                                                         | CPA4            | NM_016352.2                | 0,46                     | 666E-08   |
| Homo sapiens colony stimulating factor 2 (granulocyte-macrophage)                                        | CSF2            | NM_000758.2                | 2,08                     | 715E-09   |
| Homo sapiens CTP synthase                                                                                | CTPS            | NM_001905.1                | 2,42                     | 455E-08   |
| Homo sapiens enoyl Coenzyme A hydratase 1, peroxisomal                                                   | ECH1            | NM_001398.2                | 0,30                     | 208E-09   |
| Homo sapiens eukaryotic translation initiation factor 1B                                                 | EIF1B           | NM_005875.2                | 0,49                     | 178E-07   |
| Homo sapiens endothelial cell-specific molecule 1                                                        | ESM1            | NM_007036.3                | 3,34                     | 441E-09   |
| Homo sapiens family with sequence similarity 103, member A1                                              | FAM103A1        | NM_031452.2                | 0,49                     | 1,005E-04 |
| Homo sapiens family with sequence similarity 46, member C                                                | FAM46C          | NM_017709.3                | 2,12                     | 839E-12   |
| Homo sapiens forkhead box D1                                                                             | FOXD1           | NM_004472.2                | 2,06                     | 209E-08   |
| Homo sapiens FERM domain containing 6, transcript variant 2                                              | FRMD6           | NM_152330.3                | 2,28                     | 115E-08   |
| Homo sapiens glioblastoma amplified sequence                                                             | GBAS            | NM_001483.1                | 2,10                     | 1,409E-04 |

## PRMT6 regulates TSP-1-dependent cell migration

|                                                                                                    |           |                |      |           |
|----------------------------------------------------------------------------------------------------|-----------|----------------|------|-----------|
| Homo sapiens guanine nucleotide binding protein (G protein), gamma 10                              | GNG10     | NM_001017998.2 | 0,43 | 654E-08   |
| Homo sapiens guanine nucleotide binding protein (G protein), gamma 12                              | GNG12     | NM_018841.4    | 0,35 | 223E-08   |
| Homo sapiens histone deacetylase 1                                                                 | HDAC1     | NM_004964.2    | 0,50 | 899E-09   |
| Homo sapiens heme oxygenase (decycling) 1                                                          | HMOX1     | NM_002133.1    | 0,18 | 532E-10   |
| Homo sapiens interleukin 8                                                                         | IL8       | NM_000584.2    | 3,59 | 949E-09   |
| Homo sapiens inositol(myo)-1(or 4)-monophosphatase 2                                               | IMPA2     | NM_014214.1    | 0,36 | 331E-09   |
| Homo sapiens interferon stimulated exonuclease gene 20kDa                                          | ISG20     | NM_002201.4    | 3,53 | 175E-09   |
| Homo sapiens integrin, alpha 2 (CD49B, alpha 2 subunit of VLA-2 receptor)                          | ITGA2     | NM_002203.3    | 3,07 | 230E-10   |
| Homo sapiens membrane-bound protein potassium channel                                              | KCT2      | NM_020199      | 2,87 | 130E-08   |
| Homo sapiens KiSS-1 metastasis-suppressor                                                          | KISS1     | NM_002256.3    | 5,32 | 233E-11   |
| Homo sapiens keratin 34                                                                            | KRT34     | NM_021013.3    | 2,03 | 201E-09   |
| Homo sapiens lysosomal-associated membrane protein 1                                               | LAMP1     | NM_005561.2    | 0,47 | 136E-09   |
| N.A.                                                                                               | LOC130940 | N.A.           | 2,26 | 251E-09   |
| Homo sapiens leupaxin                                                                              | LPXN      | NM_004811.1    | 3,93 | 522E-10   |
| Homo sapiens microtubule-associated protein, RP/EB family, member 1                                | MAPRE1    | NM_012325.1    | 0,32 | 165E-09   |
| Homo sapiens membrane-associated ring finger (C3HC4) 4                                             | MARCH4    | NM_020814.1    | 3,72 | 106E-09   |
| Homo sapiens major facilitator superfamily domain containing 1                                     | MFSD1     | NM_022736.1    | 2,01 | 1,171E-04 |
| Homo sapiens MICAL C-terminal like                                                                 | MICALCL   | NM_032867.2    | 2,34 | 795E-09   |
| Homo sapiens matrix metallopeptidase 7 (matrilysin, uterine)                                       | MMP7      | NM_002423.3    | 2,01 | 406E-08   |
| Homo sapiens matrix metallopeptidase 9 (gelatinase B, 92kDa gelatinase, 92kDa type IV collagenase) | MMP9      | NM_004994.2    | 4,90 | 515E-10   |
| Homo sapiens membrane protein, palmitoylated 4 (MAGUK p55 subfamily member 4)                      | MPP4      | NM_033066.1    | 2,41 | 105E-09   |
| Homo sapiens metallothionein 1X                                                                    | MT1X      | NM_005952.2    | 0,43 | 293E-07   |
| Homo sapiens netrin G1, transcript variant 3                                                       | NTNG1     | NM_014917.2    | 2,96 | 465E-09   |
| Homo sapiens poly(A) polymerase alpha                                                              | PAPOLA    | NM_032632.3    | 0,45 | 506E-08   |
| Homo sapiens plasminogen activator, urokinase                                                      | PLAU      | NM_002658.2    | 2,90 | 506E-10   |
| Homo sapiens procollagen-lysine, 2-oxoglutarate 5-dioxygenase 2, transcript variant 1              | PLOD2     | NM_182943.2    | 2,62 | 782E-08   |
| Homo sapiens podocalyxin-like, transcript variant 1                                                | PODXL     | NM_001018111.1 | 2,21 | 545E-11   |
| Homo sapiens protein arginine methyltransferase 6                                                  | PRMT6     | NM_018137.1    | 0,24 | 750E-11   |
| Homo sapiens polypyrimidine tract binding protein 2                                                | PTBP2     | NM_021190.1    | 0,41 | 575E-08   |
| Homo sapiens protein tyrosine phosphatase-like (proline instead of catalytic arginine), member b   | PTPLB     | NM_198402.2    | 0,39 | 401E-07   |
| Homo sapiens raftlin, lipid raft linker 1                                                          | RAFTLIN   | NM_015150.1    | 2,21 | 109E-10   |
| Homo sapiens ras homolog gene family, member Q                                                     | RHOQ      | NM_012249.3    | 2,21 | 888E-07   |

PRMT6 regulates TSP-1-dependent cell migration

|                                                                                                                        |           |                |      |         |
|------------------------------------------------------------------------------------------------------------------------|-----------|----------------|------|---------|
| Homo sapiens response gene to complement 32                                                                            | RGC32     | NM_014059.2    | 2,16 | 372E-08 |
| Homo sapiens transmembrane protein 158 (RIS1)                                                                          | TMEM158   | NM_015444.2    | 0,27 | 972E-09 |
| Homo sapiens scavenger receptor class B, member 2                                                                      | SCARB2    | NM_005506.2    | 0,42 | 868E-10 |
| Homo sapiens secretogranin V (7B2 protein)                                                                             | SCG5      | NM_003020.1    | 3,20 | 128E-09 |
| Homo sapiens serpin peptidase inhibitor, clade A (alpha-1 antiproteinase, antitrypsin), member 1, transcript variant 2 | SERPINA1  | NM_001002236.1 | 2,10 | 158E-09 |
| Homo sapiens serpin peptidase inhibitor, clade E (nexin, plasminogen activator inhibitor type 1), member 1             | SERPINE1  | NM_000602.1    | 2,12 | 296E-10 |
| Homo sapiens serpin peptidase inhibitor, clade E (nexin, plasminogen activator inhibitor type 1), member 2             | SERPINE2  | NM_006216.2    | 2,18 | 146E-08 |
| Homo sapiens solute carrier organic anion transporter family, member 2A1                                               | SLCO2A1   | NM_005630.1    | 2,23 | 278E-08 |
| Homo sapiens sorting nexin 4                                                                                           | SNX4      | NM_003794.2    | 0,49 | 111E-08 |
| Homo sapiens signal peptidase complex subunit 3 homolog ( <i>S. cerevisiae</i> )                                       | SPCS3     | NM_021928.1    | 2,13 | 354E-09 |
| Homo sapiens spermidine synthase                                                                                       | SRM       | NM_003132.2    | 2,18 | 848E-08 |
| Homo sapiens transformation growth factor beta activated kinase like                                                   | TAK1L     | NM_020152      | 2,31 | 119E-09 |
| Homo sapiens thrombospondin 1                                                                                          | THBS1     | NM_003246.2    | 2,48 | 342E-07 |
| Homo sapiens tumor necrosis factor receptor superfamily, member 11b (osteoprotegerin)                                  | TNFRSF11B | NM_002546.3    | 3,91 | 198E-11 |
| Homo sapiens tyrosylprotein sulfotransferase 1                                                                         | TPST1     | NM_003596.2    | 2,35 | 447E-10 |
| Homo sapiens thioredoxin domain containing 12 (endoplasmic reticulum)                                                  | TXNDC12   | NM_015913.2    | 2,02 | 214E-08 |
| Homo sapiens ubiquitin-conjugating enzyme E2Q (putative) 2                                                             | UBE2Q2    | NM_173469.1    | 0,46 | 533E-07 |
| Homo sapiens urocortin 2                                                                                               | UCN2      | NM_033199.3    | 2,08 | 186E-09 |
| Homo sapiens uroporphyrinogen decarboxylase                                                                            | UROD      | NM_000374.3    | 0,31 | 337E-11 |
| Homo sapiens vitamin K epoxide reductase complex, subunit 1-like 1                                                     | VKORC1L1  | NM_173517.3    | 2,03 | 301E-08 |

<sup>a</sup>Fold change ( $\leq$  or  $\geq$  2-fold,  $p \leq 0.05$ ) indicates the ratio of average gene expression signals of the siPRMT6-treated U2OS cells to those of the control siGFP-treated cells.

For results normalization, we used robust multichip average (RMA) background adjustment, variance-stabilizing transformation (VST) method and quantile normalization. The EB (Wright and Simon) statistical correction was used for fold-change values and p-values analysis.

N.A. : not available.
